# Supplementary material
Source: publisher figshare collection journal article supplement (https://acs.figshare.com/ndownloader/files/11038196)
Supplement: Supplementary file 1 [file 11038196]

## **Supporting Information**

# **Temperature Dependence of the Air/Water Interface Revealed by Polarization Sensitive Sum-Frequency Generation Spectroscopy**

Daniel R. Moberg, Shelby C. Straight, and Francesco Paesani\*

*Department of Chemistry and Biochemistry, University of California, San Diego, La Jolla,  
California 92093, United States*

E-mail: fpaesani@ucsd.edu

## Structure of Water Slabs

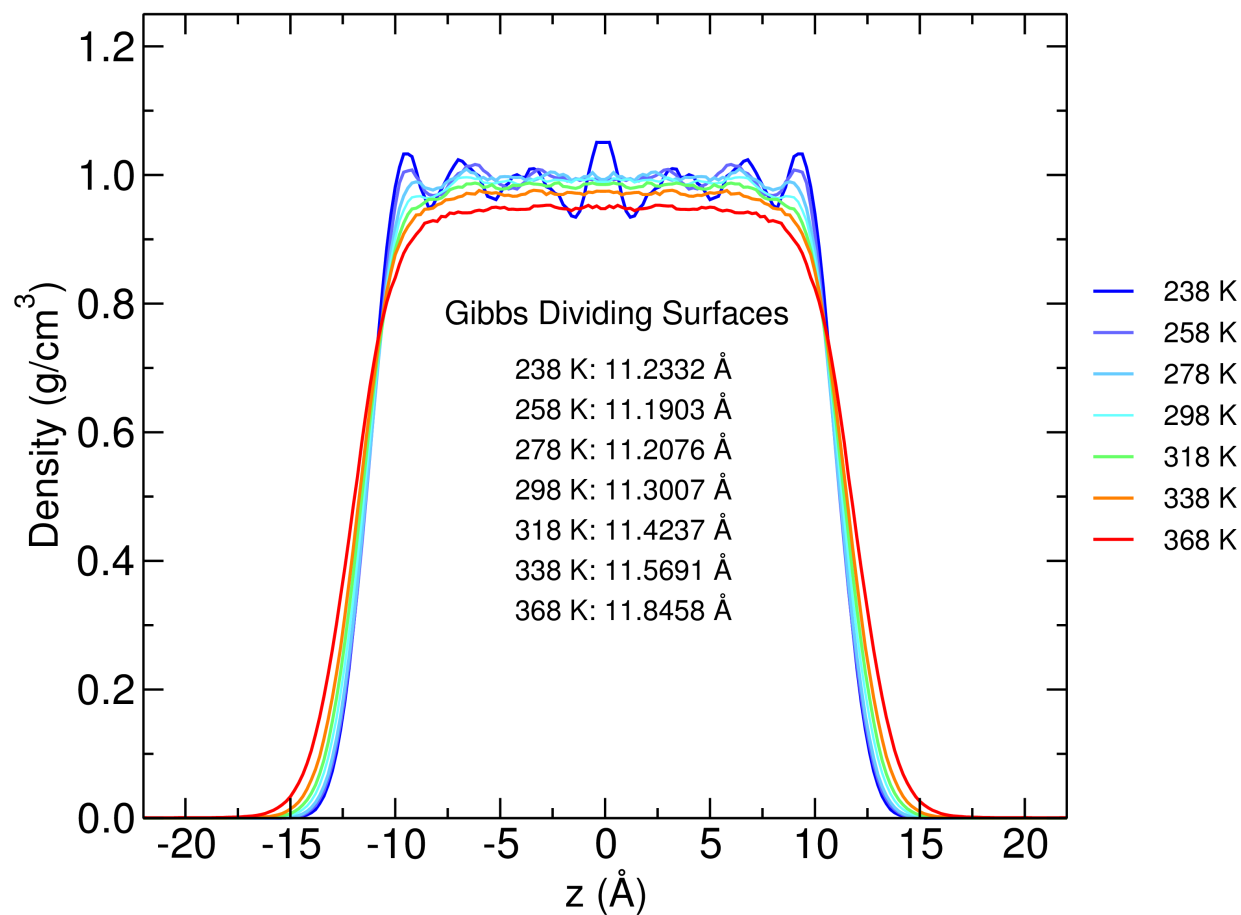

Figure S1: Density profiles of water slabs as a function of temperature. The Gibbs dividing surfaces for each temperature are also included.

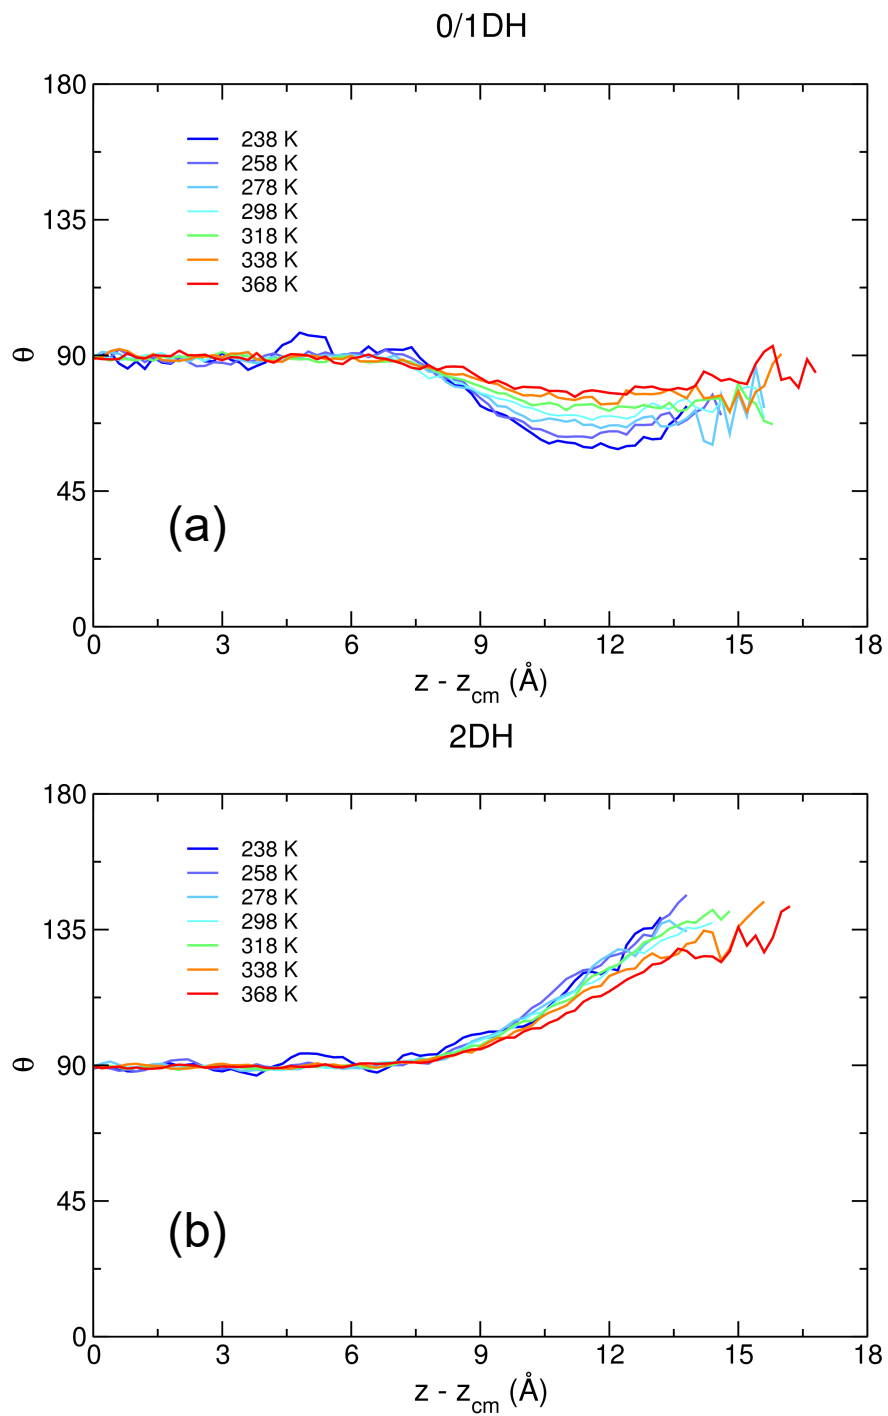

Figure S2: Temperature dependence of the average angle for water molecules as a function of distance from the center of mass of simulation slab for (a) 0/1DH and (b) 2DH.

## $\chi_{ijk}^{(2)}$ Spectra - No Fresnel Factors

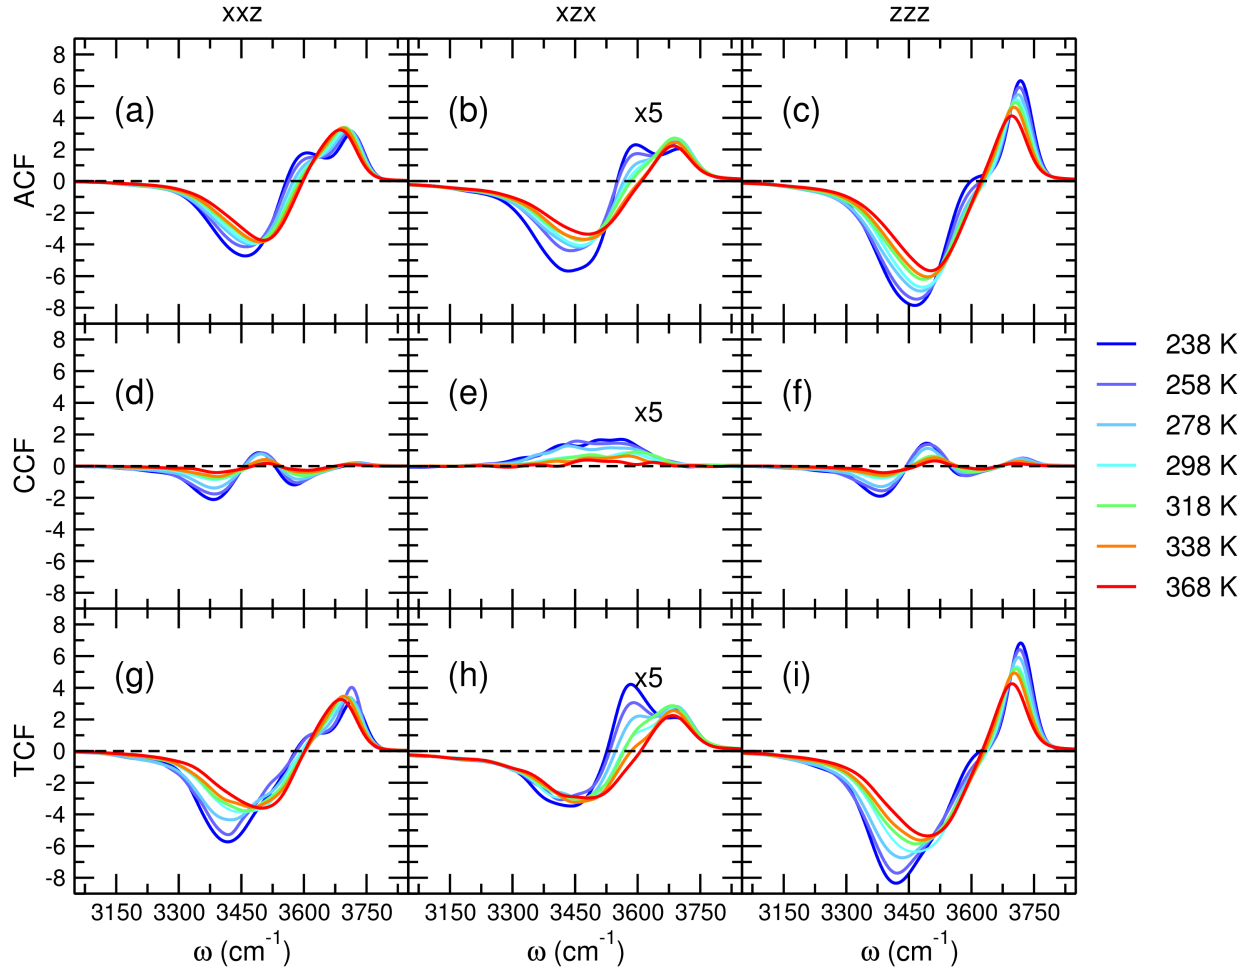

Figure S3: Polarization and temperature dependent vSFG spectra of the OH stretching region at the air/water interface. From top-to-bottom: auto-correlation contribution (ACF, a-c), cross-correlation contribution only (CCF, d-f), and total contribution (TCF, g-i) to the vSFG spectra with intermolecular cut-off of 4.0 Å. From left to right: imaginary components of  $\chi_{xxz}^{(2)}(\omega)$ ,  $\chi_{xzx}^{(2)}(\omega)$ , and  $\chi_{zzz}^{(2)}(\omega)$ . All  $\chi_{pqr}^{(2)}(\omega)$  were calculated according to Eq. 2 in the main text and normalized relative to  $k_B T_{298}$  (see Table S1).

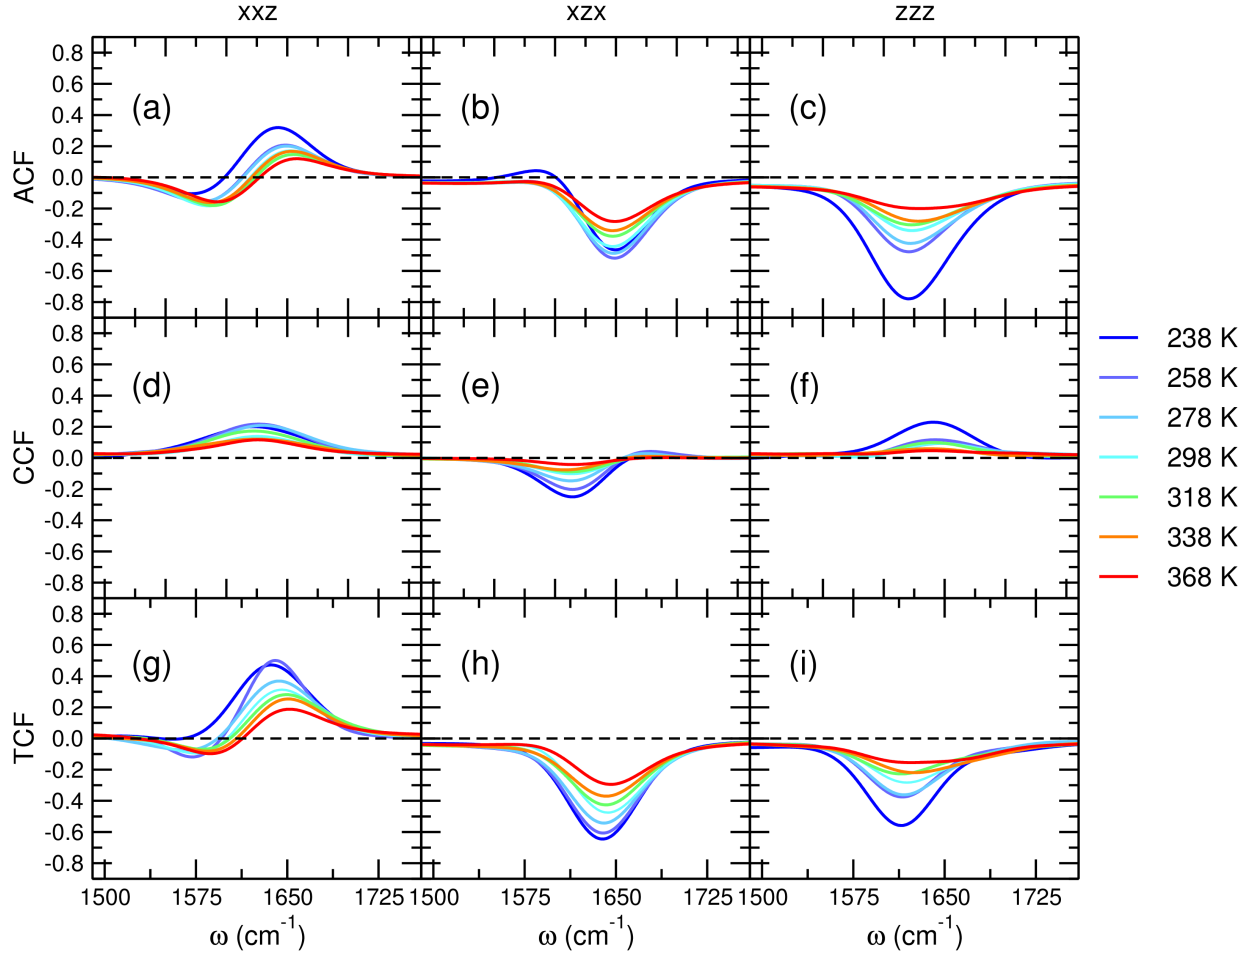

Figure S4: Polarization and temperature dependent vSFG spectra of the OH bending region at the air/water interface. From top-to-bottom: auto-correlation contribution (ACF, a-c), cross-correlation contribution only (CCF, d-f), and total contribution (TCF, g-i), to the vSFG spectra with intermolecular cut-off of 4.0 Å. From left to right: imaginary components of  $\chi_{xxz}^{(2)}(\omega)$ ,  $\chi_{xzx}^{(2)}(\omega)$ , and  $\chi_{zzz}^{(2)}(\omega)$ . All  $\chi_{pqr}^{(2)}(\omega)$  were calculated according to Eq. 2 in the main text and normalized relative to  $k_B T_{298}$  (see Table S1).

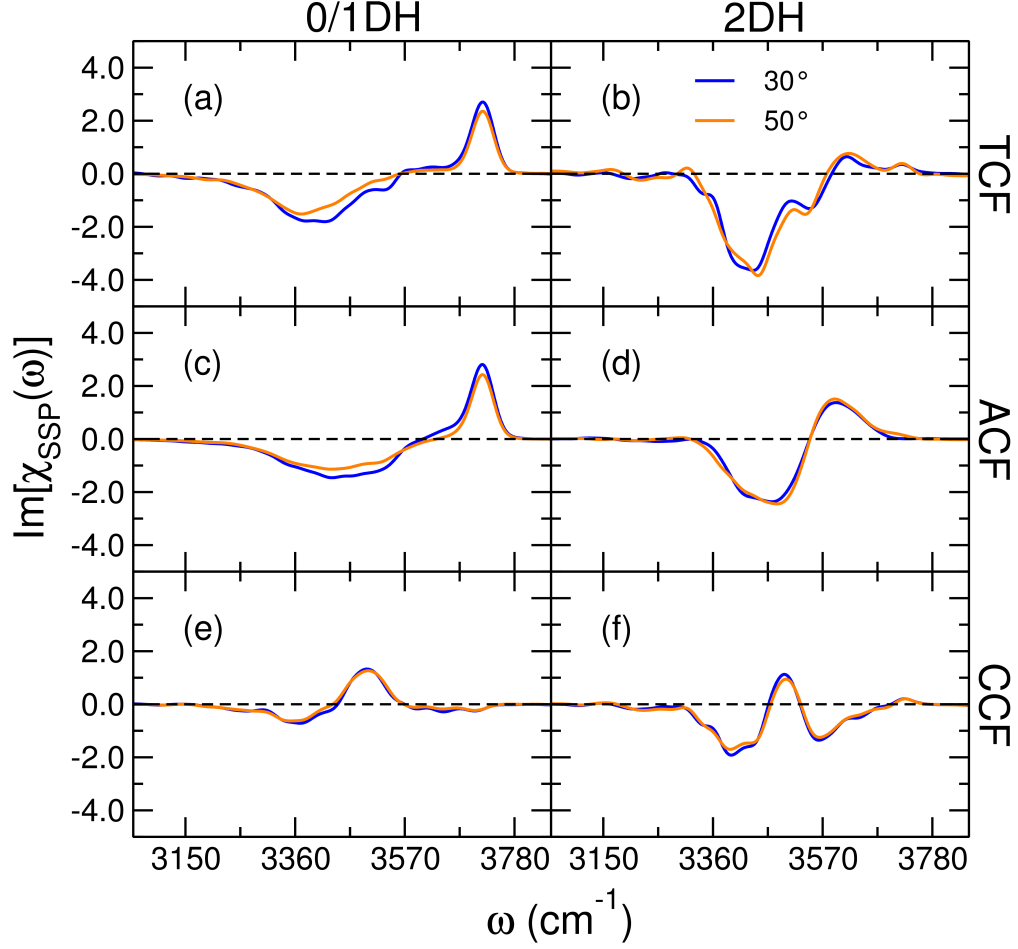

Figure S5: Comparison of (a, c, e) 0/1DH and (b, d, f) 2DH spectra using hydrogen bond angle cutoffs of 30° and 50° at 238 K. The top row contains the total correlation functions, the second row contains the autocorrelation function, and the third row contains cross-correlation function contributions. All  $\chi_{pqr}^{(2)}(\omega)$  were calculated according to Eq. 2 in the main text and normalized relative to  $k_B T_{298}$  (see Table S1).

**Table S1: Redshift applied to each spectrum in the stretching region based on a linear fit to difference between classical and centroid molecular dynamics simulations performed in Ref. 1.**

| Temperature (K) | Stretching redshift (cm <sup>-1</sup> ) | Bending redshift (cm <sup>-1</sup> ) |
|-----------------|-----------------------------------------|--------------------------------------|
| 238             | 155.96                                  | 59.39                                |
| 258             | 157.62                                  | 57.97                                |
| 278             | 159.27                                  | 56.56                                |
| 298             | 160.93                                  | 55.14                                |
| 318             | 162.59                                  | 53.73                                |
| 338             | 164.24                                  | 52.31                                |
| 368             | 166.73                                  | 50.19                                |

## References

- (1) Reddy, S. K.; Moberg, D. R.; Straight, S. C.; Paesani, F. Temperature-Dependent Vibrational Spectra and Structure of Liquid Water from Classical and Quantum Simulations with the MB-pol Potential Energy Function. *J. Chem. Phys.* **2017**, *147*, 244504.
